# Supplementary material for: One-step electrophoretic fabrication of a graphene and carbon nanotube-based scaffold for manganese-based pseudocapacitors
Source: Royal Society of Chemistry journal article supplement (doi:10.1039/c6ra10724a), 2016-01-01
Supplement: c6ra10724a1.pdf [file c6ra10724a1.pdf]

Table S1. Porous characteristics and specific capacitance of different electrode materials determined from nitrogen physisorption at  $-196^{\circ}\text{C}$  and constant charge-discharge cycling test (at  $0.25 \text{ A g}^{-1}$ ), respectively.

| Sample No.                  | $S_{\text{BET}}^{\text{a}}$<br>( $\text{m}^2 \text{ g}^{-1}$ ) | $V_{\text{t}}^{\text{b}}$<br>( $\text{cm}^3 \text{ g}^{-1}$ ) | Pore size distribution            |                                  | Specific capacitance<br>( $\text{F g}^{-1}$ ) |
|-----------------------------|----------------------------------------------------------------|---------------------------------------------------------------|-----------------------------------|----------------------------------|-----------------------------------------------|
|                             |                                                                |                                                               | $V_{\text{micro}}^{\text{c}}$ (%) | $V_{\text{meso}}^{\text{d}}$ (%) |                                               |
| <i>Before GCD cycling</i>   |                                                                |                                                               |                                   |                                  |                                               |
| CNT                         | 92.6                                                           | 0.36                                                          | 1.1                               | 98.9                             | ~16                                           |
| rGO                         | 38.4                                                           | 0.12                                                          | 1.2                               | 98.8                             | ~45                                           |
| rGO-Mn                      | 39.0                                                           | 0.16                                                          | 1.5                               | 98.5                             | ~184                                          |
| rGO-CNT-Mn                  | 69.2                                                           | 0.28                                                          | 1.3                               | 98.7                             | ~240                                          |
| rGO-CNT                     | 68.4                                                           | 0.25                                                          | 1.3                               | 98.7                             | ~23                                           |
| $\text{MnO}_x$              | 12.3                                                           | 0.08                                                          | 1.2                               | 98.8                             | ~68                                           |
| <i>After 200 GCD cycles</i> |                                                                |                                                               |                                   |                                  |                                               |
| rGO-Mn                      | 37.1                                                           | 0.15                                                          | 1.0                               | 99.0                             | ~181                                          |
| rGO-CNT-Mn                  | 65.9                                                           | 0.27                                                          | 1.4                               | 98.6                             | ~238                                          |

<sup>a</sup>  $S_{\text{BET}}$ : Specific surface area computed using the BET equation.

<sup>b</sup>  $V_{\text{t}}$ : Total pore volume estimated at a relative pressure of 0.98.

<sup>c</sup>  $V_{\text{micro}}$ : Micropore volume determined from the D-R equation.

<sup>d</sup>  $V_{\text{meso}}$ : Mesopore volume determined from the subtraction of micropore volume from total pore volume.
